# Supplementary material
Source: ML conference proceedings conference paper supplement (https://proceedings.neurips.cc/paper_files/paper/2011/hash/16a5cdae362b8d27a1d8f8c7b78b4330-Abstract.html)

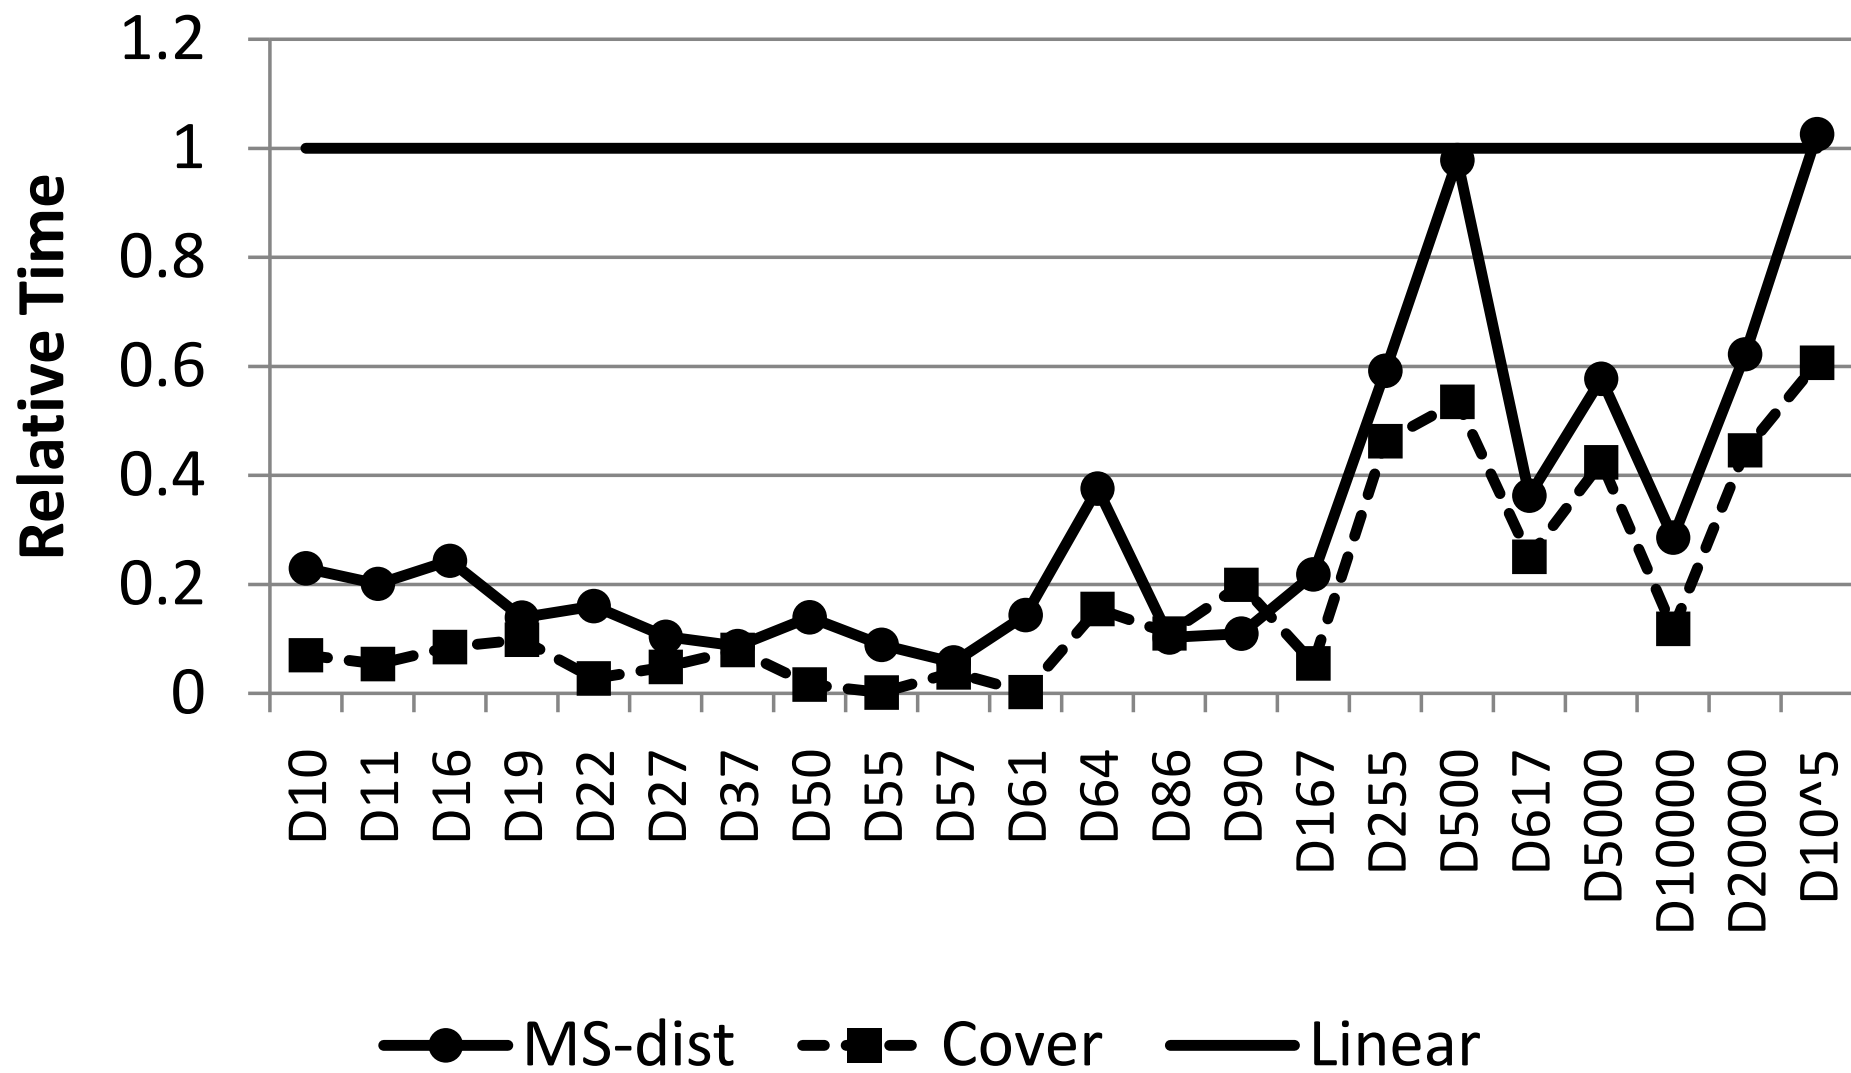

Supplement: Supplementary file 1 [file 16a5cdae362b8d27a1d8f8c7b78b4330-Supplemental.zip]

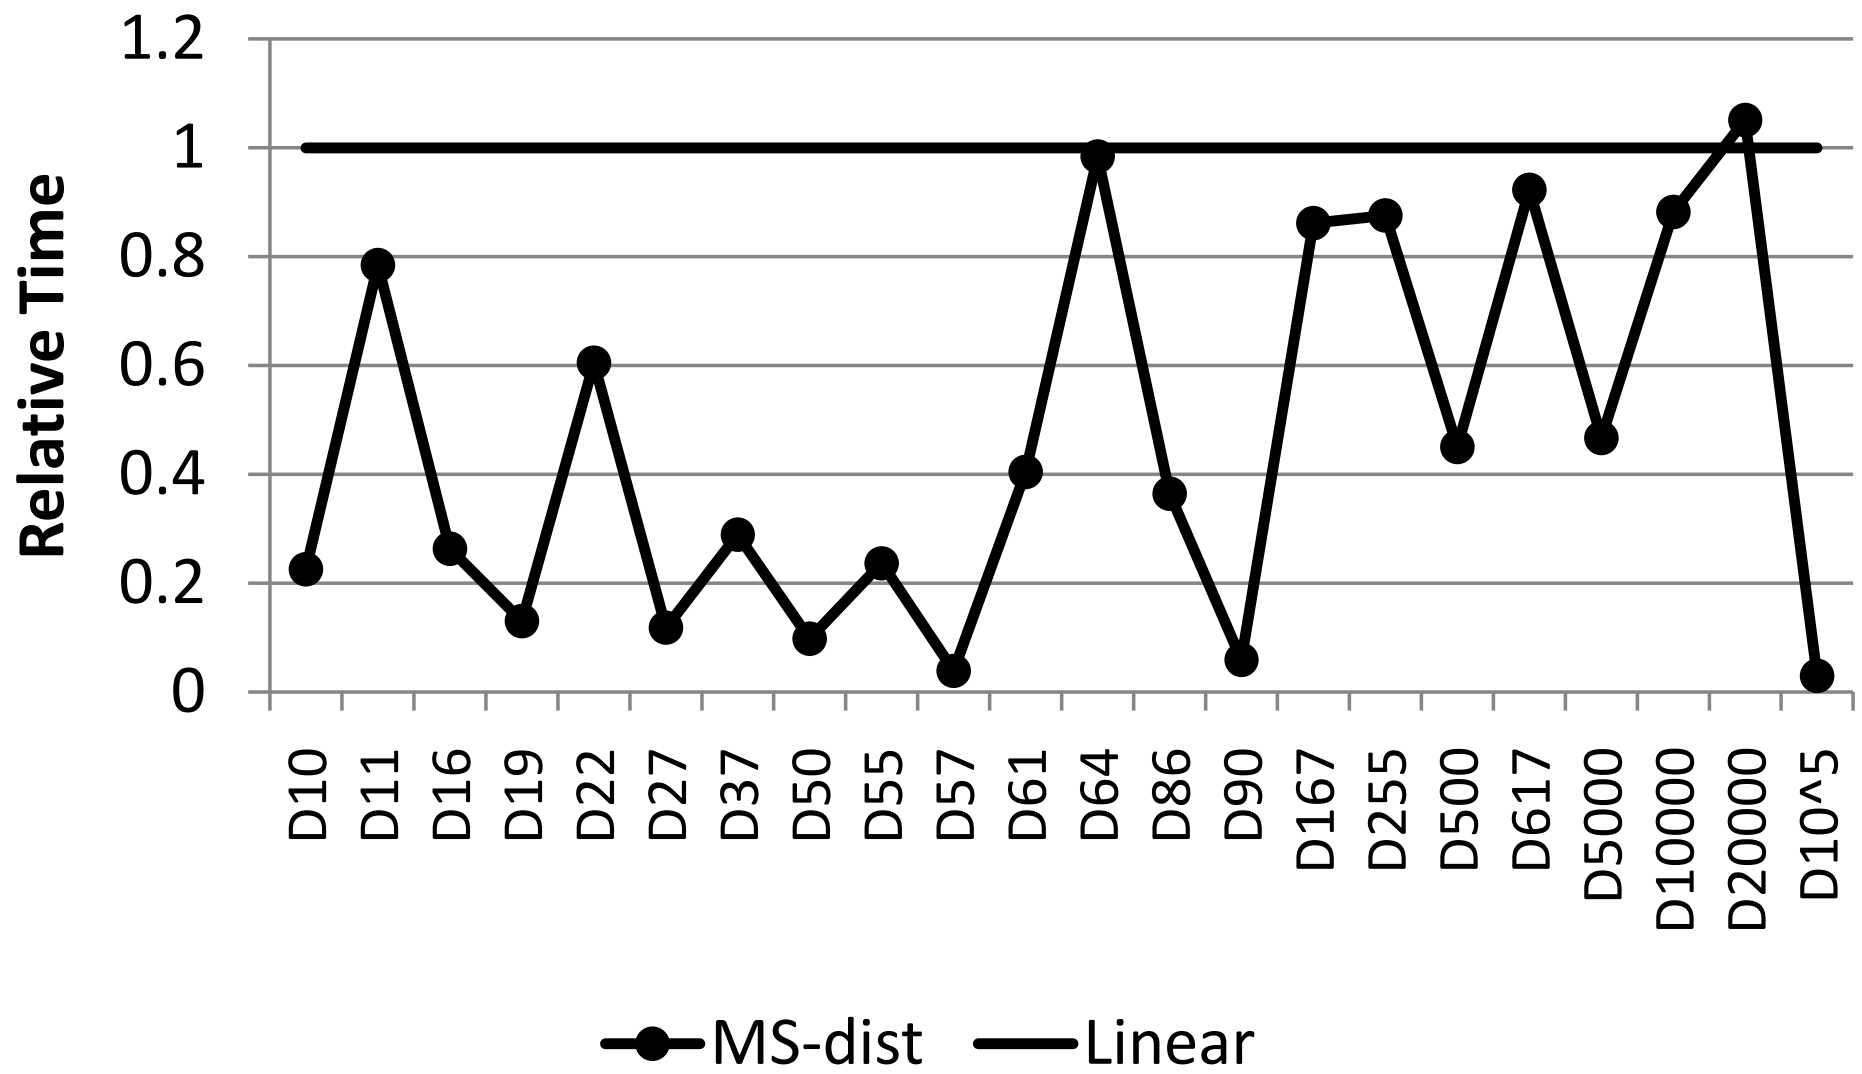

Supplement: Supplementary file 3 [file 16a5cdae362b8d27a1d8f8c7b78b4330-Supplemental.zip]

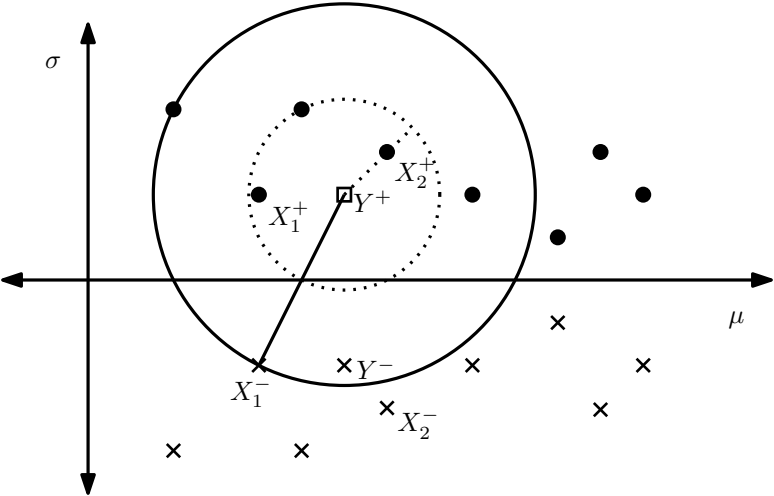

Supplement: Supplementary file 4 [file 16a5cdae362b8d27a1d8f8c7b78b4330-Supplemental.zip]

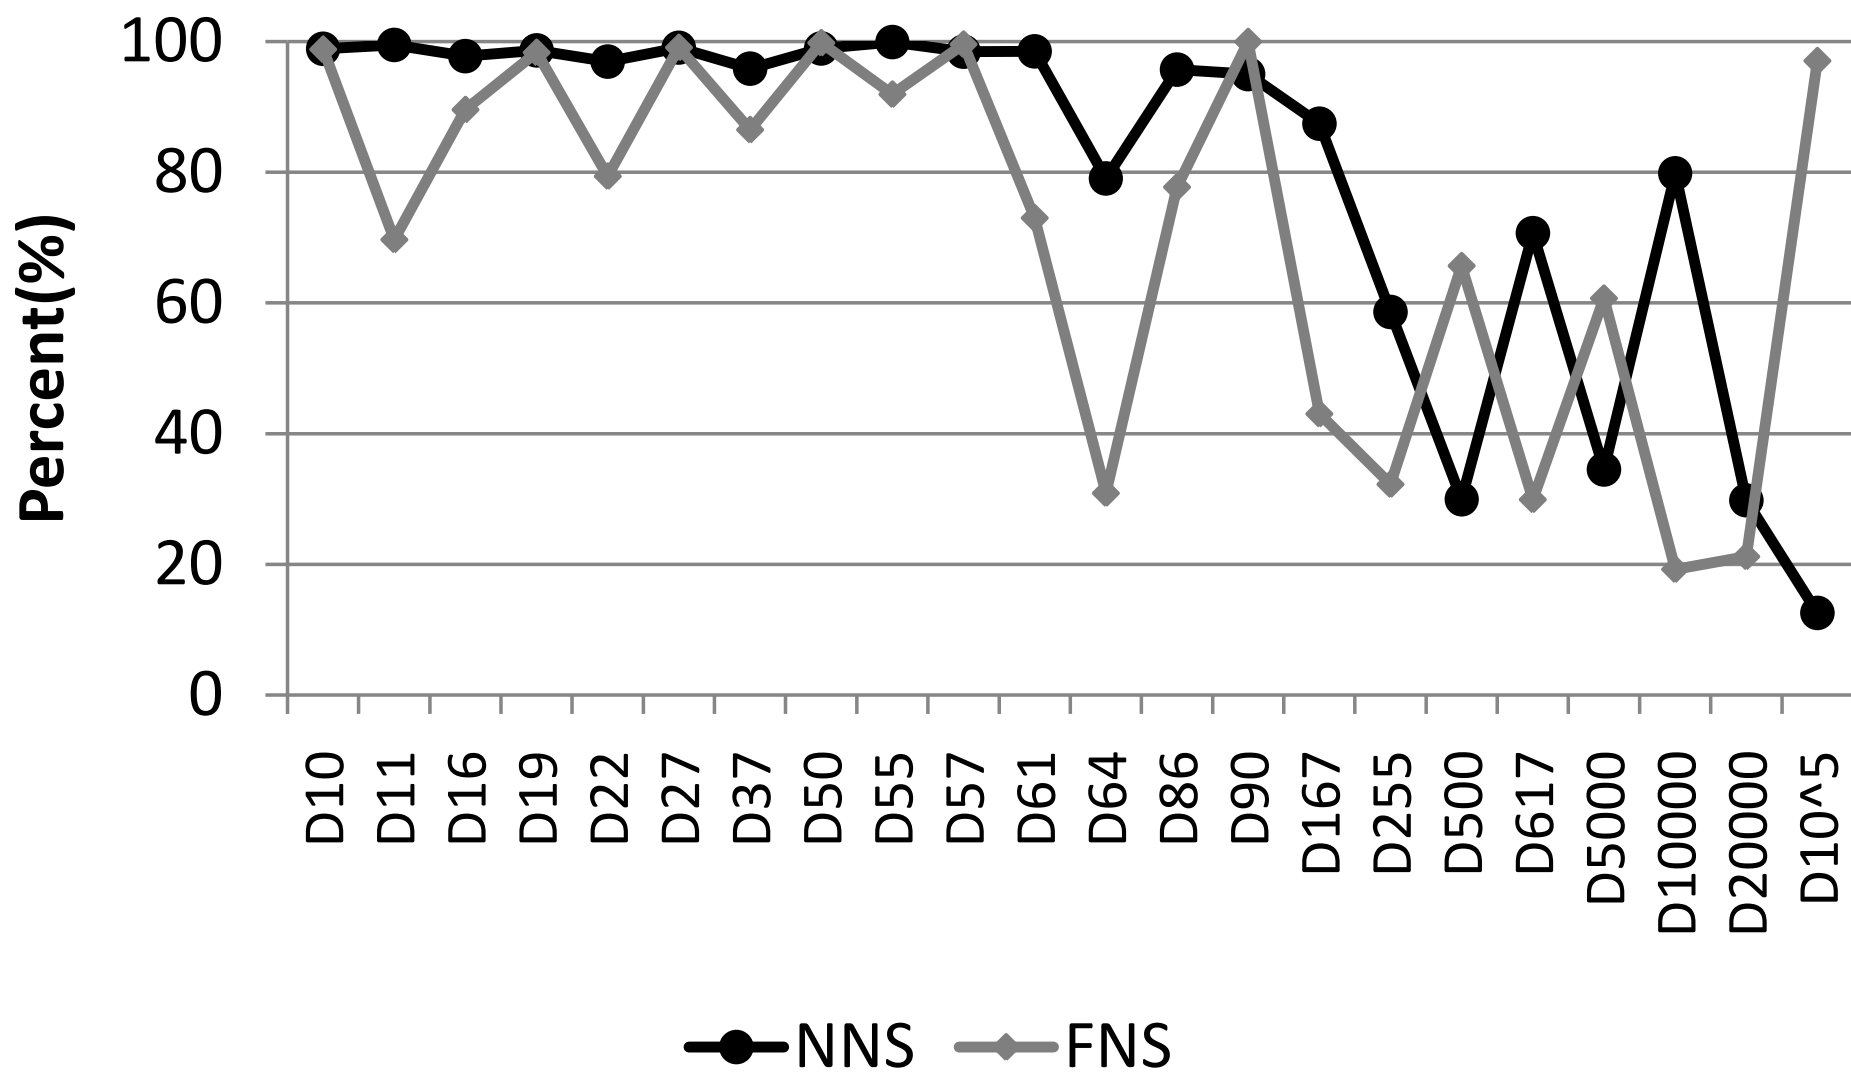

Supplement: Supplementary file 5 [file 16a5cdae362b8d27a1d8f8c7b78b4330-Supplemental.zip]

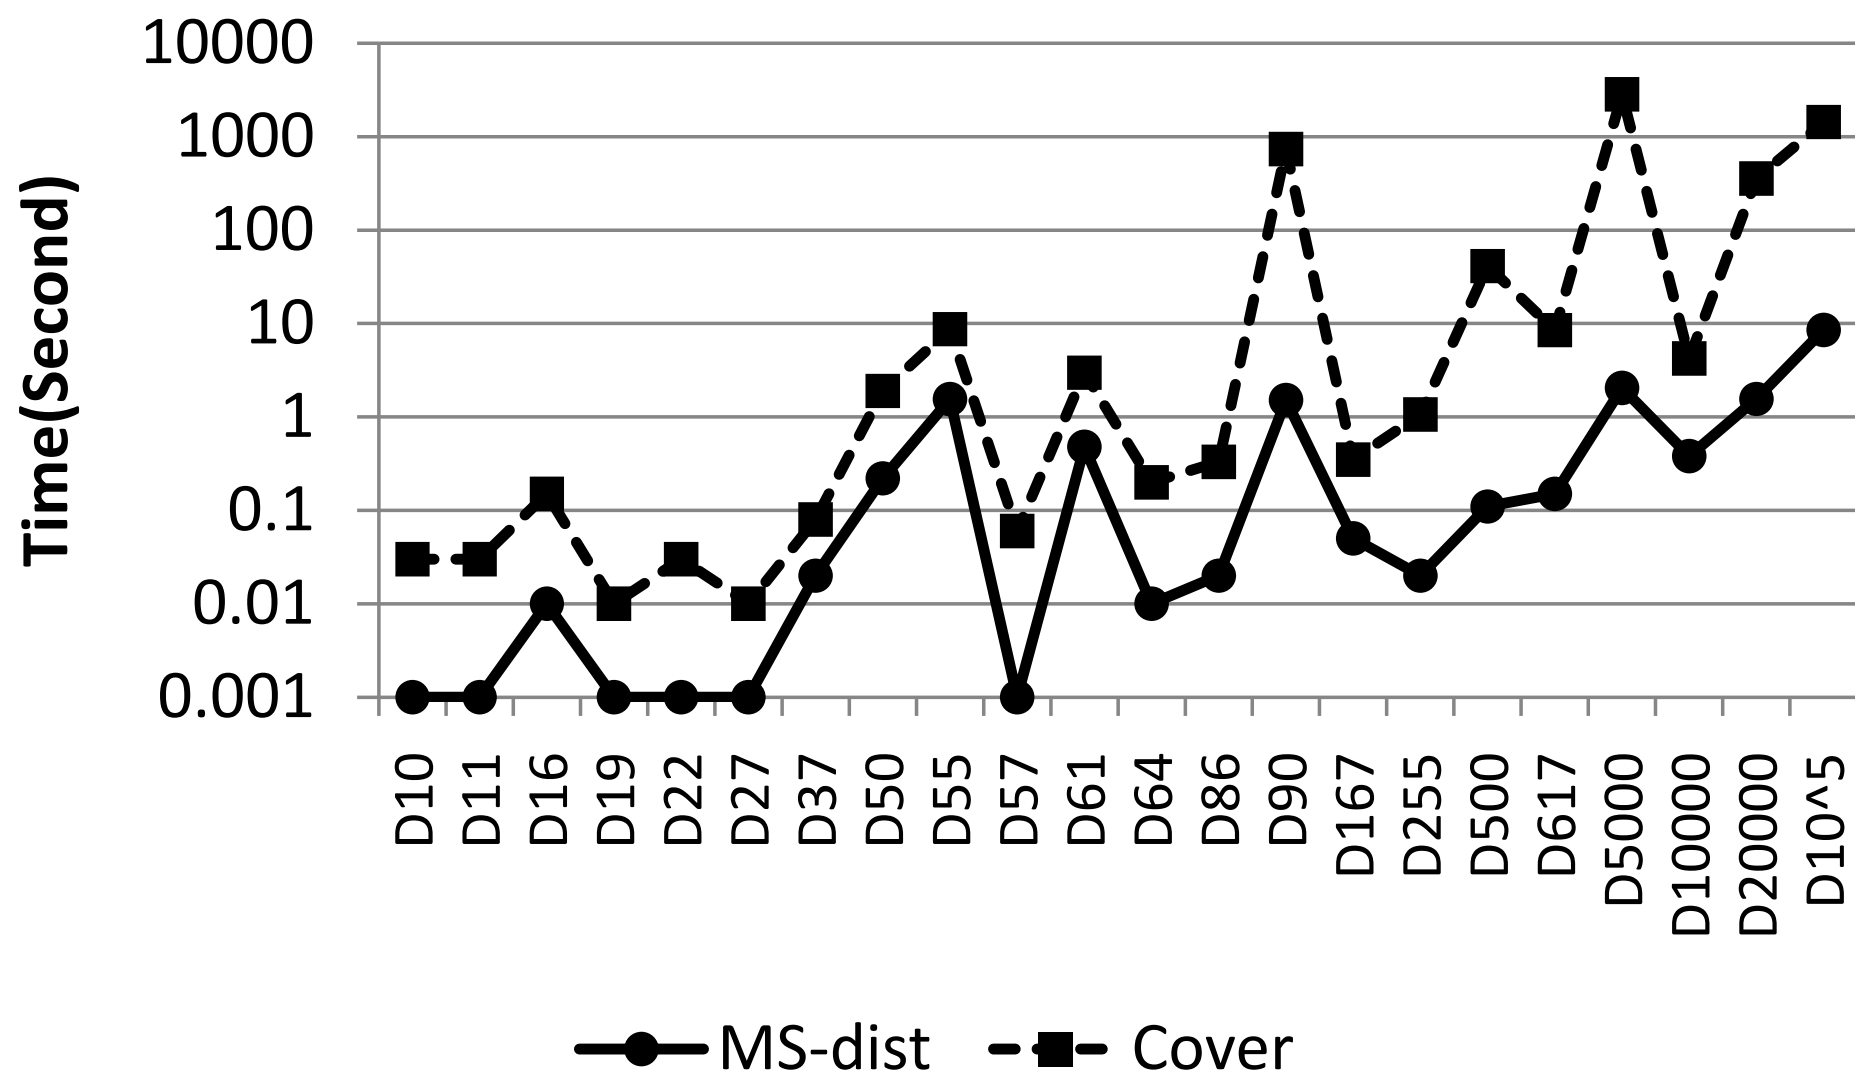

Supplement: Supplementary file 6 [file 16a5cdae362b8d27a1d8f8c7b78b4330-Supplemental.zip]
